# Supplementary material for: Improving the charge transport of the ternary blend active layer for efficient semitransparent organic solar cells
Source: Royal Society of Chemistry journal article supplement (doi:10.1039/d0ee03378b), 2020-01-01
Supplement: d0ee03378b1.pdf [file d0ee03378b1.pdf]

## Electronic Supplementary Information

### Improving the charge transport of the ternary blend active layer for efficient semitransparent organic solar cells

*Pan Yin,<sup>ab</sup> Zhigang Yin,<sup>a</sup> Yunlong Ma<sup>a</sup> and Qingdong Zheng<sup>\*a</sup>*

<sup>a</sup> State Key Laboratory of Structural Chemistry, Fujian Institute of Research on the Structure of Matter, Chinese Academy of Sciences, 155 Yangqiao Road West, Fuzhou, 350002, China.

E-mail: qingdongzheng@fjirsm.ac.cn.

<sup>b</sup> University of Chinese Academy of Sciences, 19 Yuquan Road, Beijing, 100049, China.

### Experimental section

**Materials:** PBDB-TF, Y6 and other materials used in this work were purchased from Solarmer Energy Inc, Sigma-Aldrich, Alfa Aesar, Adamas-beta Ltd and Suna Tech Inc. Unless otherwise specified, these materials and chemicals were used without any further purification. The synthesis of DTNIF has been reported by our group previously.<sup>[S1]</sup>

**General Characterization:** UV-Vis absorption spectra and transmittance spectra were measured on a PerkinElmer Lambda 365 spectrometer. The PL spectra were conducted on an Edinburgh Instrument FLS 920. Surface morphologies of the active layers were analyzed using a dimension icon AFM in the tapping mode. GIWAXS measurements were performed at 13A beamline of National Synchrotron Radiation Research Center (NSRRC, Taiwan). Ceshigo Research Service ([www.ceshigo.com](http://www.ceshigo.com)) provided the technical support for the GIWAXS measurements. The GIWAXS samples were prepared on PEDOT:PSS-coated Si substrates using the identical blend solutions as those for the best-performance OSCs. All samples for the GIWAXS measurements were radiated at 12.13 keV X-ray with an incident angle of 0.10-0.15°. The coherence

length was estimated by the Scherrer equation:  $CL = 2\pi K/\text{FWHM}$ , where FWHM is the full width at half-maximum of the peak and K is a shape factor (0.9 was used here).

**Device Fabrication and Characterization:** Devices with a conventional structure of ITO/PEDOT:PSS/active layer/PDIN/Ag were fabricated in a glovebox, where the active layer was comprised of the binary or ternary blends with PBDB-TF, Y6 and/or DTNIF. The ITO patterned glass was cleaned with ultrasonic treatment in detergent, deionized water, acetone, ethanol, and isopropyl alcohol sequentially, and dried in an ultraviolet–ozone chamber for 15 min. The PEDOT:PSS layer was deposited by spin-coating at 3500 rpm on top of the pre-cleaned ITO glass substrate. The binary and ternary blends were pre-dissolved in chloroform with different weight ratios using 1-chloronaphthalene (0.5% volume) as the solvent additive. The mixed solutions were spin-coated onto the PEDOT:PSS-covered substrates at 4000 rpm for 50 s, and the resulting active layers were annealed at 90 °C for 5 min. Then the PDIN solution was spin-coated onto the active layers at 4000 rpm for 30 s. Finally, ~100 nm of Ag was deposited on the PDIN layer through shadow masks (0.04 cm<sup>2</sup>) by thermal evaporation. The thicknesses of the active layer were controlled by varying the spin-coating speed and blend concentration, and measured on a Bruker Dektak XT surface profilometer. Photovoltaic performance of solar cells was tested under 1 sun, AM 1.5G spectrum (100 mW cm<sup>-2</sup>) from an Oriel sol3A solar simulator (Newport). *J-V* measurements were carried out using a Keithley 2400 source meter. The light intensity for *J-V* measurements was calibrated with a NREL-certified silicon reference cell. EQE data were taken using the QE/IPCE measurement kit (QE-PV-SI) from Newport.

### **Fabrication and Characterization of Hole- and Electron-Only Devices**

The charge transport properties were evaluated by the SCLC method with a hole-only device configuration (ITO/PEDOT:PSS/active layer/MoO<sub>3</sub>/Ag) for hole mobility, and an electron-only device configuration (ITO/ZnO/active layer/Ca/Al) for electron mobility, respectively. Hole- and electron-only devices were fabricated under the similar fabrication condition for the best-performance ternary devices. The thickness of

the film was measured by a Bruker Dektak XT surface profilometer. The  $J$ - $V$  characterization of the devices was measured by using a computer controlled Keithley 2440 source meter. Both hole and electron mobilities were extracted by fitting the  $J$ - $V$  curves using the empirical Mott–Gurney formula in single carrier SCLC device using the following equation:<sup>[S2-S3]</sup>

$$J = \frac{9}{8} \epsilon_r \epsilon_0 \mu \frac{V^2}{L^3}$$

, where  $\epsilon_r$  is the relative dielectric constant of the active layer material (assumed to be 3),  $\mu$  is the hole or electron mobility,  $\epsilon_0$  is the permittivity of empty space ( $8.85 \times 10^{-12}$  F m<sup>-1</sup>),  $L$  is the film thickness of the active layer,  $V$  is the internal voltage in the device, and  $V = V_{\text{appl}} - V_{\text{bi}}$ , where  $V_{\text{appl}}$  is the applied voltage to the device, and  $V_{\text{bi}}$  is the built-in voltage due to the relative work function difference between the two electrodes (in the hole- and electron-only devices, the  $V_{\text{bi}}$  values are 0.2 and 0.7 V, respectively), and  $J$  is the current density (A m<sup>-2</sup>).

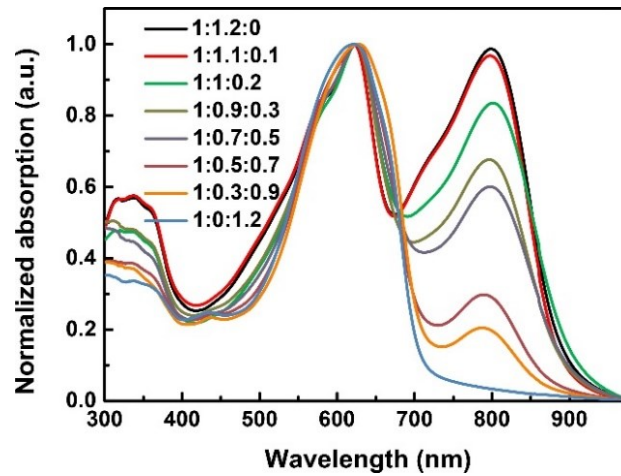

**Figure S1.** Normalized absorption spectra of PBDB-TF:Y6:DTNIF blend films with different weight ratios.

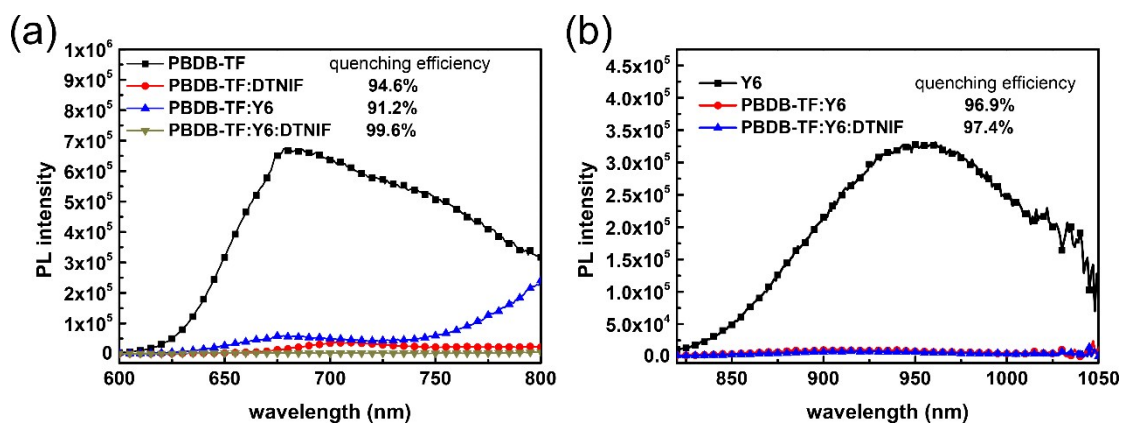

**Figure S2.** a) PL spectra of the neat PBDB-TF film, binary PBDB-TF:DTNIF blend film, binary PBDB-TF:Y6 blend film, and ternary PBDB-TF:Y6:DTNIF (1:1.1:0.1) blend film upon an excitation at 580 nm. b) PL spectra of the neat Y6 film, binary PBDB-TF:Y6 blend film, and ternary PBDB-TF:Y6:DTNIF (1:1.1:0.1) blend film upon an excitation at 800 nm.

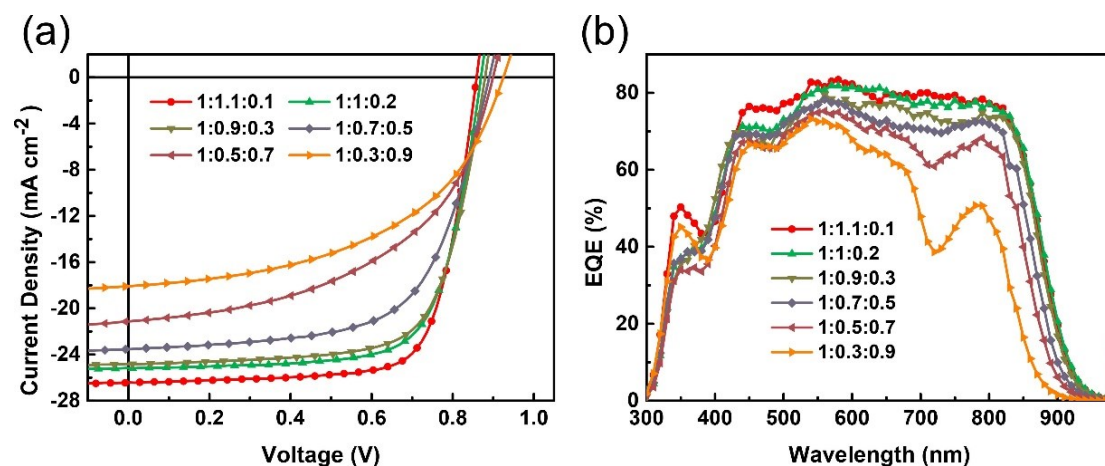

**Figure S3.** a)  $J$ - $V$  curves and b) EQE spectra of the optimal ternary OSCs with different blend ratios.

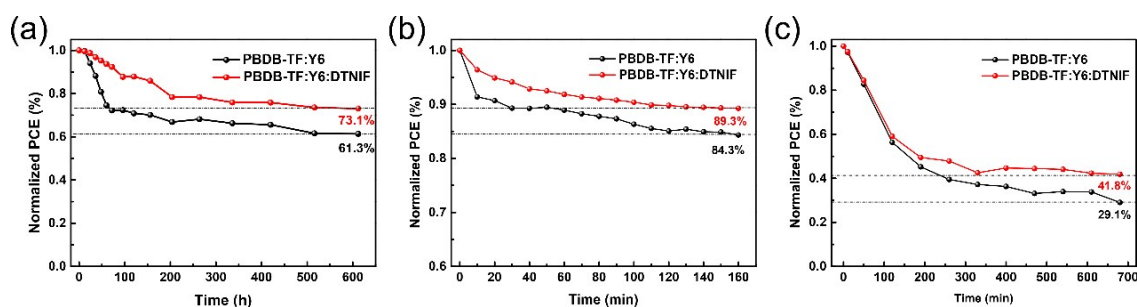

**Figure S4.** Normalized PCEs of the binary device based on PBDB-TF:Y6 and the ternary device based on PBDB-TF:Y6:DTNIF after storage in air (a), under light illumination (b), and under thermal aging at 80 °C (c).

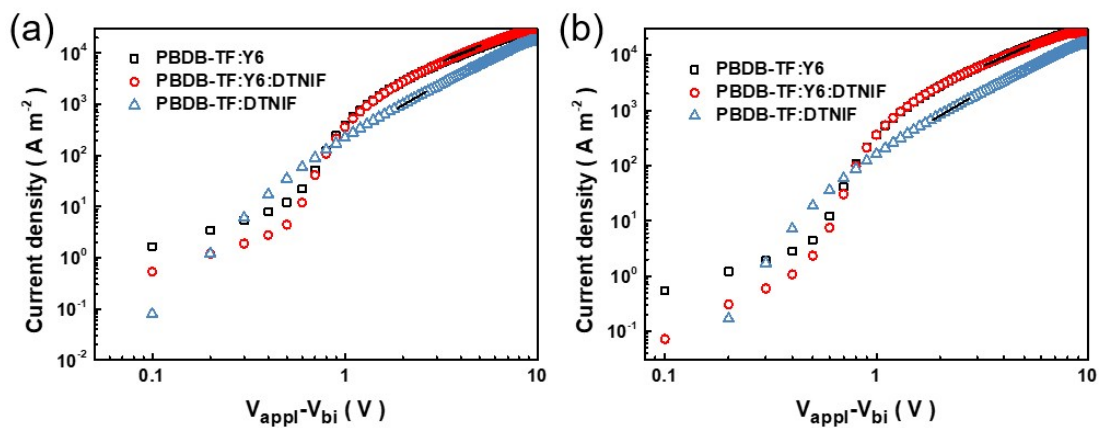

**Figure S5.** a)  $J$ - $V$  curves for the a) hole-only and b) electron-only devices based on binary PBDB-TF:Y6, PBDB-TF:DTNIF and ternary PBDB-TF:Y6:DTNIF blends.

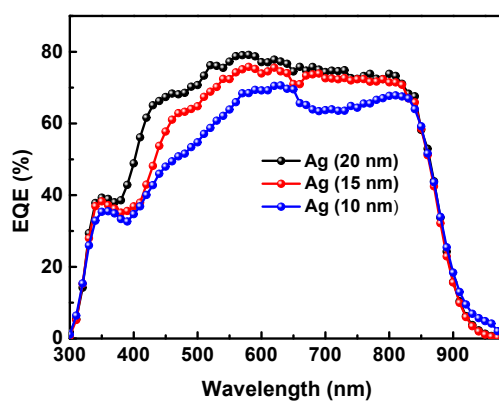

**Figure S6.** EQE spectra of the ternary semitransparent devices with different anode thicknesses (20, 15 and 10 nm).

检测数据/结果:  
Data/Results of Test

- 1 Standard Test Condition (STC): Total Irradiance:  $1000 \text{ W/m}^2$   
Temperature:  $25.0 \text{ }^\circ\text{C}$   
Spectral Distribution: AM1.5G

2. Measurement Data under STC

| Test Times    | $I_{sc}$ (mA) | $V_{oc}$ (V) | $I_{MPP}$ (mA) | $V_{MPP}$ (V) | $P_{MPP}$ (mW) | FF (%) | $\eta$ (%) |
|---------------|---------------|--------------|----------------|---------------|----------------|--------|------------|
| 1             | 0.9078        | 0.8247       | 0.7934         | 0.6685        | 0.5304         | 70.85  | 13.43      |
| 2             | 0.9149        | 0.8248       | 0.7934         | 0.6681        | 0.5301         | 70.25  | 13.43      |
| 3             | 0.9199        | 0.8244       | 0.7934         | 0.6680        | 0.5300         | 69.89  | 13.42      |
| Average Value | 0.9142        | 0.8246       | 0.7934         | 0.6682        | 0.5302         | 70.33  | 13.43      |

Mismatch factor: 0.9959

3. I-V & P-V Characteristic Curves under STC

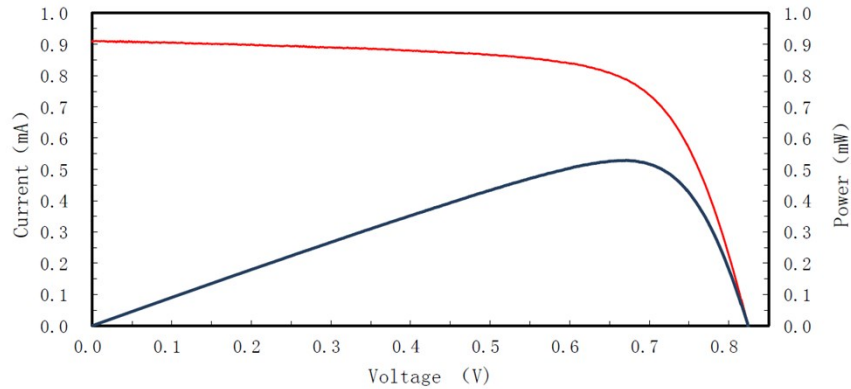

Figure 1. I-V and P-V characteristic curves of the measured sample under STC

**Figure S7.** Measurement and certification of the best-performance ternary semitransparent device based on PBDB-TF:Y6:DTNIF (15-nm Ag) from Fujian Metrology Institute (National PV Industry Measurement and Testing Center) in China.

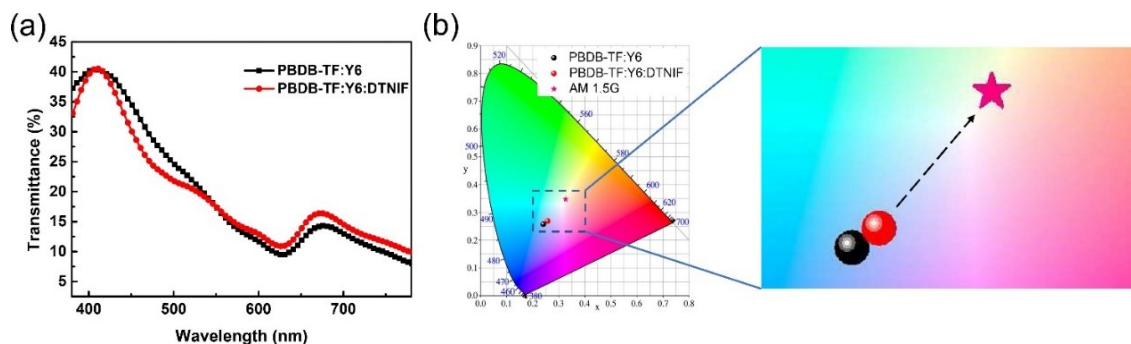

**Figure S8.** a) Visible transmittance spectra and b) the CIE 1931 color space of binary semitransparent device based on PBDB-TF:Y6 and the ternary semitransparent device based on PBDB-TF:Y6:DTNIF.

**Table S1.** Photovoltaic performance of the binary OSCs based on PBDB-TF:Y6 under different fabrication conditions.

| PBDB-TF:Y6 | $V_{OC}$ [V] | $J_{SC}$ [mA cm <sup>-2</sup> ] | FF [%] | PCE [%] | Thermal annealing |
|------------|--------------|---------------------------------|--------|---------|-------------------|
| 1.0:1.1    | 0.855        | 25.22                           | 70.42  | 15.19   | 90 °C, 5 min      |
| 1.0:1.3    | 0.846        | 25.21                           | 70.81  | 15.11   | 90 °C, 5 min      |
| 1.0:1.2    | 0.851        | 25.01                           | 71.33  | 15.18   | 80 °C, 5 min      |
| 1.0:1.2    | 0.848        | 25.82                           | 69.19  | 15.16   | 100 °C, 5 min     |
| 1.0:1.2    | 0.849        | 25.26                           | 71.36  | 15.31   | 90 °C, 5 min      |
| 1.0:1.2    | 0.853        | 25.05                           | 68.92  | 14.73   | 90 °C, 3 min      |
| 1.0:1.2    | 0.842        | 25.58                           | 69.61  | 14.99   | 90 °C, 8 min      |

**Table S2.** Photovoltaic performance of the binary OSCs based on PBDB-TF:DTNIF under different fabrication conditions.

| PBDB-TF:DTNIF | $V_{OC}$ [V] | $J_{SC}$ [mA cm <sup>-2</sup> ] | FF [%] | PCE [%] | Thermal Annealing |
|---------------|--------------|---------------------------------|--------|---------|-------------------|
| 1:1.1         | 1.01         | 12.55                           | 54.51  | 6.91    | without           |
| 1:1.3         | 0.99         | 11.47                           | 43.77  | 4.99    | without           |
| 1:1.2         | 0.97         | 13.92                           | 50.35  | 6.82    | 90 °C, 5 min      |
| 1:1.2         | 1.01         | 12.76                           | 56.86  | 7.31    | without           |

**Table S3.** Photovoltaic performance of the ternary OSCs based on PBDB-TF:Y6:DTNIF under different annealing conditions and different amounts of solvent additive.

| PBDB-TF:Y6:DTNIF | $V_{oc}$ [V] | $J_{sc}$ [mA cm <sup>-2</sup> ] | FF [%] | PCE [%] | CN [%] <sup>a</sup> | Thermal Annealing |
|------------------|--------------|---------------------------------|--------|---------|---------------------|-------------------|
| 1:1.1:0.1        | 0.860        | 26.22                           | 72.25  | 16.28   | 0.5                 | 80 °C, 5 min      |
| 1:1.1:0.1        | 0.856        | 26.70                           | 70.73  | 16.16   | 0.5                 | 100 °C, 5 min     |
| 1:1.1:0.1        | 0.859        | 25.64                           | 72.69  | 16.02   | 0.3                 | 90 °C, 5 min      |
| 1:1.1:0.1        | 0.860        | 25.67                           | 72.23  | 15.94   | 0.8                 | 90 °C, 5 min      |
| 1:1.1:0.1        | 0.858        | 26.40                           | 73.80  | 16.73   | 0.5                 | 90 °C, 5 min      |
| 1:1.1:0.1        | 0.861        | 26.52                           | 72.16  | 16.48   | 0.5                 | 90 °C, 3 min      |
| 1:1.1:0.1        | 0.857        | 26.07                           | 71.07  | 15.88   | 0.5                 | 90 °C, 8 min      |

<sup>a</sup> CN: 1-chloronaphthalene.

**Table S4.** Photovoltaic properties of OSCs based on the ternary PBDB-TF:Y6:DTNIF with different blend ratios.

| PBDB-TF:Y6:DTNIF | $V_{oc}$ [V] | $J_{sc}$ [mA cm <sup>-2</sup> ] | FF [%] | PCE [%] <sup>a</sup> | $J_{cal}$ [mA cm <sup>-2</sup> ] <sup>b</sup> |
|------------------|--------------|---------------------------------|--------|----------------------|-----------------------------------------------|
| 1.0:1.1:0.1      | 0.858        | 26.40                           | 73.80  | 16.73 (16.48±0.13)   | 25.08                                         |
| 1.0:1.0:0.2      | 0.870        | 25.18                           | 71.41  | 15.63 (15.50±0.11)   | 24.01                                         |
| 1.0:0.9:0.3      | 0.879        | 24.81                           | 70.11  | 15.29 (15.21±0.07)   | 23.59                                         |
| 1.0:0.7:0.5      | 0.889        | 23.49                           | 63.36  | 13.24 (13.16±0.07)   | 22.50                                         |
| 1.0:0.5:0.7      | 0.898        | 21.04                           | 51.14  | 9.66 (9.59±0.11)     | 20.79                                         |
| 1.0:0.3:0.9      | 0.923        | 18.01                           | 50.57  | 8.41 (8.39±0.06)     | 17.60                                         |

<sup>a</sup> Average PCEs were obtained from over 12 devices in parallel. <sup>b</sup> The  $J_{sc}$  values were calculated from the EQE curves.



**Table S5.** Parameters of the ordered structures.

| PBDB-<br>TF:Y6:DTNIF | $\pi$ - $\pi$ stacking                     |                                            | Lamellar stacking                             |                                  |
|----------------------|--------------------------------------------|--------------------------------------------|-----------------------------------------------|----------------------------------|
|                      | $d$ -spacing [ $\text{\AA}$ ] <sup>a</sup> | CL [ $\text{\AA}$ ]<br>(FWHM) <sup>b</sup> | $d$ -spacing<br>[ $\text{\AA}$ ] <sup>c</sup> | CL [ $\text{\AA}$ ] (FWHM)       |
| 1.0:1.2:0            | 3.67                                       | 22.90 (0.247 $\text{\AA}^{-1}$ )           | 20.93                                         | 54.03 (0.105 $\text{\AA}^{-1}$ ) |
| 1.0:1.1:0.1          | 3.61                                       | 25.83 (0.219 $\text{\AA}^{-1}$ )           | 20.72                                         | 69.61 (0.081 $\text{\AA}^{-1}$ ) |

<sup>a</sup> (010) Diffraction peak along the  $q_z$  axis; <sup>b</sup> Coherent length (CL) estimated from the Scherrer equation ( $CL=2 \pi k/\text{FWHM}$ ), in which  $k$  is the Scherrer factor and FWHM is the full-width at the half-maximum of the peak; <sup>c</sup> (100) Diffraction peak along the  $q_{xy}$  axis.

**Table S6.** Photovoltaic parameters of some representative STOSCs reported to date.

| Active Layer                       | $V_{oc}$<br>[V] | $J_{sc}$<br>[mA cm <sup>-2</sup> ] | FF<br>[%] | PCE<br>[%] | AVT   | Ref. |
|------------------------------------|-----------------|------------------------------------|-----------|------------|-------|------|
| PTB7-Th:IEICO-4Cl                  | 0.725           | 19.6                               | 59.0      | 8.38       | 25.6  | S4   |
| PBDB-T:ITIC                        | 0.88            | 13.8                               | 59.8      | 7.3        | 25.2  | S5   |
| PTB7-Th:ATT-2                      | 0.712           | 18.53                              | 59        | 7.74       | 37    | S6   |
| PTB7-Th:BT-CIC                     | 0.68            | 18.0                               | 67.5      | 8.2        | 26    | S7   |
| PTB7-Th:IHIC                       | 0.754           | 19.01                              | 68.1      | 9.77       | 36    | S8   |
| PTB7-Th:PC <sub>71</sub> BM        | 0.79            | 17.15                              | 69.1      | 9.36       | 14.31 | S9   |
| PTB7-Th:PBT1-S:PC <sub>71</sub> BM | 0.83            | 15.6                               | 70.8      | 9.2        | 20.0  | S10  |
| P3HT:ICBA                          | 0.87            | 8.79                               | 67.0      | 5.12       | 24.4  | S11  |
| PTB7-Th:IUIC                       | 0.794           | 18.31                              | 70.3      | 10.2       | 31    | S12  |
| J52:IEICO-4F:PC <sub>71</sub> BM   | 0.690           | 19.04                              | 67.2      | 8.83       | 15.8  | S13  |
| PTB7-Th:FNIC2                      | 0.728           | 21.87                              | 72.6      | 11.6       | 13.6  | S14  |
| P3TEA:FTTB-PDI4 (front)            | 1.73            | 9.62                               | 63        | 10.5       | 20    | S15  |
| PTB7-Th:IEICS-4F (rear)            |                 |                                    |           |            |       |      |
| PBDTTT-E-T:IEICO                   | 0.81            | 14.4                               | 66        | 7.9        | 23.8  | S16  |
| PM6:ID-4Cl                         | 0.748           | 13.77                              | 67.90     | 6.99       | 43.7  | S17  |
| PBN-S:IT-4F                        | 0.878           | 15.48                              | 65.5      | 8.88       | 34    | S18  |

|                                        |       |       |       |       |       |           |
|----------------------------------------|-------|-------|-------|-------|-------|-----------|
| PTB7-Th:ITVfIC                         | 0.742 | 17.54 | 63.11 | 8.21  | 26.4  | S19       |
| PTB7-Th:BDTThIT-4F:IEICO-4F            | 0.728 | 19.21 | 67.2  | 9.40  | 24.6  | S20       |
| PTB7-Th:PC <sub>71</sub> BM            | 0.806 | 14.59 | 72.4  | 8.52  | 26.2  | S21       |
| PIDT-phanQ:PC <sub>61</sub> BM (front) | 1.63  | 5.23  | 68.94 | 7.4   | 40    | S22       |
| PIDT-phanQ:PC <sub>71</sub> BM (rear)  |       |       |       |       |       |           |
| PM6:Y6                                 | 0.852 | 20.35 | 71.36 | 12.37 | 18.6  | S23       |
| PTB7-Th:IEICO-4F                       | 0.707 | 20.27 | 67.4  | 10.03 | 34.2  | S24       |
| J71:PTB7-Th:HIC                        | 0.76  | 21.08 | 58.05 | 9.37  | 21.4  | S25       |
| PBDB-T-2F:Y6                           | 0.825 | 21.56 | 72.41 | 12.88 | 25.6  | S26       |
| PBDB-TF:Y6:DTNIF                       | 0.857 | 23.61 | 71.64 | 14.50 | 19.78 | This work |
| PBDB-TF:Y6:DTNIF                       | 0.847 | 22.71 | 70.16 | 13.49 | 22.58 | This work |
| PBDB-TF:Y6:DTNIF                       | 0.844 | 20.56 | 69.93 | 12.14 | 25.89 | This work |

## References

- [S1] M. Zhang, Y. Ma, Q. Zheng, *Front. Chem.*, 2018, **6**, 427.
- [S2] P. W. M. Blom, M. J. M. de Jong, M. G. van Munster, *Phys. Rev. B*, 1997, **55**, R656.
- [S3] G. G. Malliaras, J. R. Salem, P. J. Brock, C. Scott, *Phys. Rev. B*, 1998, **58**, R13411.
- [S4] Y. Cui, C. Yang, H. Yao, J. Zhu, Y. Wang, G. Jia, F. Gao, J. Hou, *Adv. Mater.*, 2017, **29**, 1703080.
- [S5] M. B. Upama, M. Wright, N. K. Elumalai, M. A. Mahmud, D. Wang, C. Xu, A. Uddin, *ACS Photonics*, 2017, **4**, 2327.
- [S6] F. Liu, Z. Zhou, C. Zhang, J. Zhang, Q. Hu, T. Vergote, F. Liu, T. P. Russell, X. Zhu, *Adv. Mater.*, 2017, **29**, 1606574.
- [S7] Y. Li, J. D. Lin, X. Che, Y. Qu, F. Liu, L. S. Liao, S. R. Forrest, *J. Am. Chem. Soc.*, 2017, **139**, 17114.
- [S8] W. Wang, C. Yan, T. K. Lau, J. Wang, K. Liu, Y. Fan, X. Lu, X. Zhan, *Adv. Mater.*, 2017, **29**, 1701308.
- [S9] P. Shen, M. Yao, J. Liu, Y. Long, W. Guo, L. Shen, *J. Mater. Chem. A*, 2019, **7**, 4102.
- [S10] Y. Xie, L. Huo, B. Fan, H. Fu, Y. Cai, L. Zhang, Z. Li, Y. Wang, W. Ma, Y. Chen, Y. Sun, *Adv. Funct. Mater.*, 2018, **28**, 1800627.
- [S11] W. Yu, X. Jia, M. Yao, L. Zhu, Y. Long, L. Shen, *Phys. Chem. Chem. Phys.*, 2015, **17**, 23732.

- [S12] B. Jia, S. Dai, Z. Ke, C. Yan, W. Ma, X. Zhan, *Chem. Mater.*, 2017, **30**, 239.
- [S13] H. Shi, R. Xia, G. Zhang, H.-L. Yip, Y. Cao, *Adv. Energy Mater.*, 2019, **9**, 1803438.
- [S14] J. Wang, J. Zhang, Y. Xiao, T. Xiao, R. Zhu, C. Yan, Y. Fu, G. Lu, X. Lu, S. R. Marder, X. Zhan, *J. Am. Chem. Soc.*, 2018, **140**, 9140.
- [S15] S. Chen, H. Yao, B. Hu, G. Zhang, L. Arunagiri, L.-K. Ma, J. Huang, J. Zhang, Z. Zhu, F. Bai, W. Ma, H. Yan, *Adv. Energy Mater.*, 2018, **8**, 1800529.
- [S16] C. Sun, R. Xia, H. Shi, H. Yao, X. Liu, J. Hou, F. Huang, H.-L. Yip, Y. Cao, *Joule*, 2018, **2**, 1816.
- [S17] X. Li, H. Meng, F. Shen, D. Su, S. Huo, J. Shan, J. Huang, C. Zhan, *Dyes Pigm.*, 2019, **166**, 196.
- [S18] Y. Wu, H. Yang, Y. Zou, Y. Dong, J. Yuan, C. Cui, Y. Li, *Energy Environ. Sci.*, 2019, **12**, 675.
- [S19] H. Huang, X. Li, L. Zhong, B. Qiu, Y. Yang, Z.-G. Zhang, Z. Zhang, Y. Li, *J. Mater. Chem. A*, 2018, **6**, 4670.
- [S20] Z. Hu, J. Wang, Z. Wang, W. Gao, Q. An, M. Zhang, X. Ma, J. Wang, J. Miao, C. Yang, F. Zhang, *Nano Energy*, 2019, **55**, 424.
- [S21] B. Dudem, J. W. Jung, J. S. Yu, *J. Mater. Chem. A*, 2018, **6**, 14769.
- [S22] C.-Y. Chang, L. Zuo, H.-L. Yip, C.-Z. Li, Y. Li, C.-S. Hsu, Y.-J. Cheng, H. Chen, A. K. Y. Jen, *Adv. Energy Mater.*, 2014, **4**, 1301645.
- [S23] Z. Hu, Z. Wang, Q. An, F. Zhang, *Sci. Bull.*, 2020, **65**, 131.
- [S24] Y. Liu, P. Cheng, T. Li, R. Wang, Y. Li, S. Y. Chang, Y. Zhu, H. W. Cheng, K. H. Wei, X. Zhan, B. Sun, Y. Yang, *ACS Nano*, 2019, **13**, 1071.
- [S25] J. Zhang, G. Xu, F. Tao, G. Zeng, M. Zhang, Y. Yang, Y. Li, Y. Li, *Adv. Mater.*, 2019, **31**, 1807159.
- [S26] Y. Bai, C. Zhao, X. Chen, S. Zhang, S. Zhang, T. Hayat, A. Alsaedi, Z. A. Tan, J. Hou, Y. Li, *J. Mater. Chem. A*, 2019, **7**, 15887.
